# Supplementary material for: Paleotsunami Evidence in the Bahía Inglesa Coast (Atacama, Chile) Based on a Multi-Approach Analysis
Source: Research Square preprint supplement (doi:10.21203/rs.3.rs-925983/v1), 2021-09-24
Supplement: Supplementary file 1 [file 90382a4fe88f9b2599452043.docx]

**Table S1.** Morphometry of boulders in the Bahía Inglesa deposit: long axes (L) (cm), intermediate axis (I) (cm), short axes (S) (cm), weight (t), Corey Shape Factor (CSF), elevation (m a.s.l.) and Transport Figure (TF).

| **Code** | **L** | **I** | **S** | **Weight (t)** | **CSF** | **Elevation** | **TF** | |
| --- | --- | --- | --- | --- | --- | --- | --- | --- |
| **1** | 142 | 127 | 62 | 2.94 | 0.46 | 69.80 | 9162.98 | |
| **2** | 111 | 55 | 38 | 0.61 | 0.49 | 70.00 | 1946.27 | |
| **3** | 111 | 74 | 39 | 0.84 | 0.43 | 69.87 | 2611.27 | |
| **4** | 92 | 85 | 46 | 0.95 | 0.52 | 69.91 | 2922.38 | |
| **5** | 66 | 54 | 32 | 0.30 | 0.54 | 69.66 | 905.76 | |
| **6** | 86 | 63 | 33 | 0.47 | 0.45 | 69.68 | 1416.03 | |
| **7** | 120 | 55 | 52 | 0.90 | 0.64 | 69.81 | 2742.10 | |
| **8** | 64 | 42 | 42 | 0.30 | 0.81 | 69.84 | 879.31 | |
| **9** | 170 | 30 | 34 | 0.46 | 0.48 | 69.72 | 1372.90 | |
| **10** | 78 | 50 | 44 | 0.45 | 0.71 | 69.63 | 1336.82 | |
| **11** | 100 | 73 | 28 | 0.54 | 0.33 | 69.66 | 1615.39 | |
| **12** | 76 | 73 | 34 | 0.50 | 0.46 | 69.73 | 1496.33 | |
| **13** | 74 | 56 | 55 | 0.60 | 0.85 | 69.46 | 1754.52 | |
| **14** | 96 | 76 | 60 | 1.15 | 0.70 | 69.53 | 3406.82 | |
| **15** | 81 | 56 | 40 | 0.48 | 0.59 | 69.45 | 1387.82 | |
| **16** | 110 | 54 | 30 | 0.47 | 0.39 | 69.25 | 1320.54 | |
| **17** | 88 | 46 | 28 | 0.30 | 0.44 | 69.32 | 846.89 | |
| **18** | 104 | 63 | 65 | 1.12 | 0.80 | 69.45 | 3226.36 | |
| **19** | 115 | 64 | 41 | 0.79 | 0.48 | 68.85 | 2105.86 | |
| **20** | 85 | 33 | 30 | 0.22 | 0.57 | 68.76 | 575.68 | |
| **21** | 120 | 83 | 40 | 1.05 | 0.40 | 68.70 | 2768.13 | |
| **22** | 130 | 60 | 36 | 0.74 | 0.41 | 68.54 | 1915.64 | |
| **23** | 83 | 50 | 46 | 0.50 | 0.71 | 68.13 | 1254.06 | |
| **24** | 100 | 66 | 43 | 0.75 | 0.53 | 68.25 | 1864.98 | |
| **25** | 130 | 102 | 30 | 1.05 | 0.26 | 65.95 | 2083.39 | |
| **26** | 125 | 80 | 47 | 1.24 | 0.47 | 65.76 | 2420.87 | |
| **27** | 87 | 67 | 45 | 0.69 | 0.46 | 65.27 | 1256.25 | |
| **28** | 160 | 87 | 70 | 2.56 | 0.59 | 65.33 | 4714.58 | |
| **29** | 130 | 64 | 44 | 0.96 | 0.59 | 66.21 | 1964.77 | |
| **30** | 115 | 68 | 50 | 1.03 | 0.48 | 66.42 | 2131.58 | |
| **31** | 103 | 76 | 40 | 0.82 | 0.57 | 66.79 | 1771.60 | |
| **32** | 90 | 77 | 66 | 1.20 | 0.45 | 67.93 | 2886.19 | |
| **33** | 64 | 47 | 30 | 0.24 | 0.79 | 68.23 | 584.55 | |
| **34** | 96 | 58 | 44 | 0.64 | 0.55 | 68.72 | 1657.86 | |
| **35** | 100 | 76 | 60 | 1.20 | 0.59 | 68.96 | 3185.48 | |
| **36** | 96 | 53 | 26 | 0.35 | 0.69 | 68.91 | 924.89 | |
| **37** | 103 | 64 | 60 | 1.04 | 0.37 | 69.07 | 2767.13 | |
| **38** | 78 | 73 | 56 | 0.84 | 0.74 | 68.96 | 2190.60 | |
| **39** | 112 | 73 | 70 | 1.51 | 0.74 | 68.89 | 3905.43 | |
| **40** | 143 | 99 | 50 | 1.86 | 0.77 | 68.84 | 4814.15 | |
| **41** | 90 | 58 | 49 | 0.67 | 0.42 | 68.71 | 1718.94 | |
| **42** | 110 | 40 | 37 | 0.43 | 0.68 | 69.14 | 1154.21 | |
| **43** | 325 | 212 | 90 | 16.31 | 0.56 | 69.27 | 44994.25 | |
| **44** | 110 | 56 | 55 | 0.89 | 0.34 | 69.10 | 2395.14 | |
| **45** | 160 | 104 | 62 | 2.71 | 0.70 | 69.29 | 7518.27 | |
| **46** | 74 | 55 | 42 | 0.45 | 0.48 | 69.63 | 1305.08 | |
| **47** | 80 | 42 | 30 | 0.27 | 0.66 | 69.60 | 777.82 | |
| **48** | 146 | 123 | 28 | 1.32 | 0.52 | 69.58 | 3877.85 | |
| **49** | 81 | 51 | 40 | 0.43 | 0.21 | 69.52 | 1270.33 | |
| **50** | 62 | 54 | 51 | 0.45 | 0.62 | 69.46 | 1305.28 | |
| **51** | 107 | 59 | 60 | 1.00 | 0.88 | 69.28 | 2840.23 | |
| **52** | 110 | 67 | 60 | 1.16 | 0.76 | 68.99 | 3176.00 | |
| **53** | 105 | 68 | 43 | 0.81 | 0.70 | 68.99 | 2194.98 | |
| **54** | 117 | 30 | 42 | 0.39 | 0.51 | 68.87 | 1032.21 | |
|  | | | | | | | |
| **Mean** | 107.6 ± 39.24 | 67.9 ± 28.28 | 45.8 ± 13.42 | 1.15 ± 2.18 | 0.56 ± 0.15 | 68.79 ± 1.21 | 3067.68 ± 6018.51 | |
